# Supplementary material for: Kinetic study of a swelling-induced network of folds in a cross-linked PS-PDMS film
Source: Royal Society of Chemistry journal article supplement (doi:10.1039/c4ra13674h), 2014-12-03
Supplement: c4ra13674h1.pdf [file c4ra13674h1.pdf]

Supporting information

Kinetic study of swelling-induced network of folds in cross-linked PS-PDMS film

*Xin Xu, Xuelin Yao, Feng Chen\* and Qiang Fu\**

College of Polymer Science & Engineering, State Key Laboratory of Polymer  
Materials Engineering, Sichuan University, Chengdu 610065, China

E-mail: fengchen@scu.edu.cn (F.C.); Fax: 086-28-85460690;

E-mail: qiangfu@scu.edu.cn (Q.F.); Fax: 086-28-85461795



Fig. S1 AFM images of (a) cross-linked PS film and (b) cross-linked PDMS film at room temperature.



Fig. S2 AFM height image of cross-linked PS-PDMS films after swelled for 24h in saturated ethanol vapor.



Fig. S3 AFM image of pure PS-PDMS film swelled for 6h in THF vapor after RIE etching.
